# Supplementary material for: Chiral helical disubstituted polyacetylenes form optically active particles through precipitation polymerization
Source: Royal Society of Chemistry journal article supplement (doi:10.1039/c9py00248k), 2019-01-01
Supplement: c9py00248k1.pdf [file c9py00248k1.pdf]

## Chiral Helical Disubstituted polyacetylenes Construct Optically

### Active Particles through Precipitation Polymerization

Yingjie Zhang,<sup>1,2</sup> Yi Wu,<sup>1,2</sup> Riwei Xu,<sup>\*2</sup> Jianping Deng<sup>\*1,2</sup>

#### Preparation of monomer and crosslinker

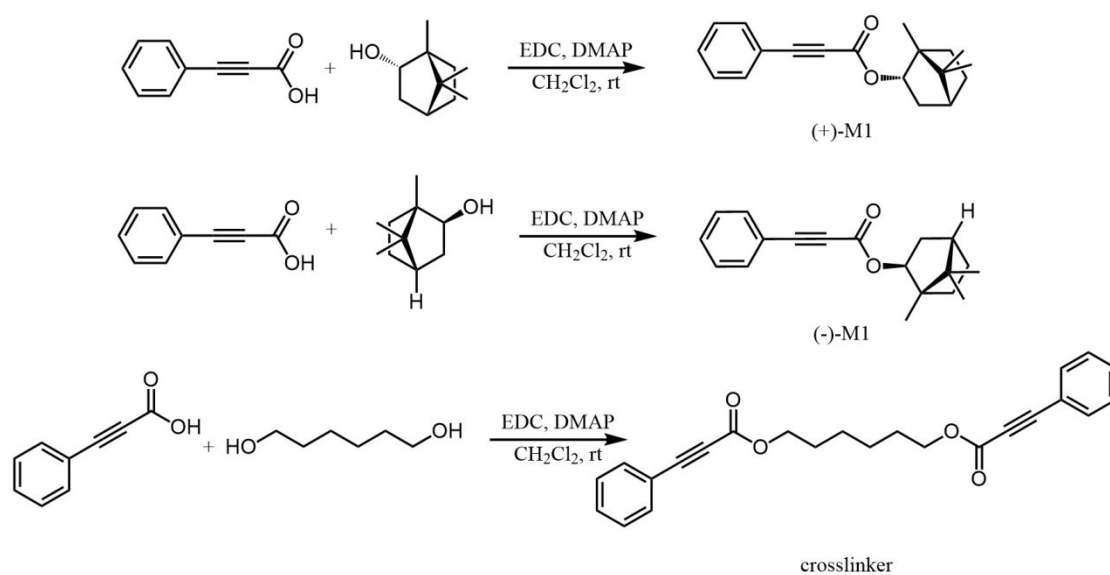

**Figure S1.** The preparation process of (+)-M1, (-)-M1 and crosslinker.

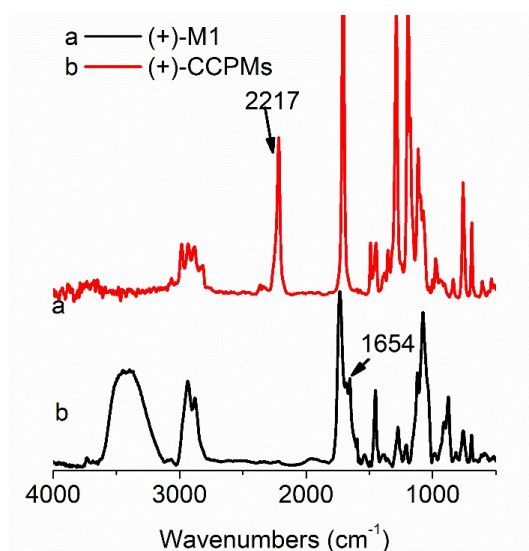

**Figure S2.** FT-IR spectra of (+)-M1 and (+)-CCPMs (in KBr tablet).

In FT-IR spectrum of (+)-M1 and (+)-CCPMs, 2223  $\text{cm}^{-1}$  for ( $-\text{C}\equiv\text{C}-$ ); 1702  $\text{cm}^{-1}$ , 1290  $\text{cm}^{-1}$  and 1189  $\text{cm}^{-1}$  for ( $-\text{CO}-\text{O}-$ ), 765  $\text{cm}^{-1}$  and 690  $\text{cm}^{-1}$  for benzene ring.

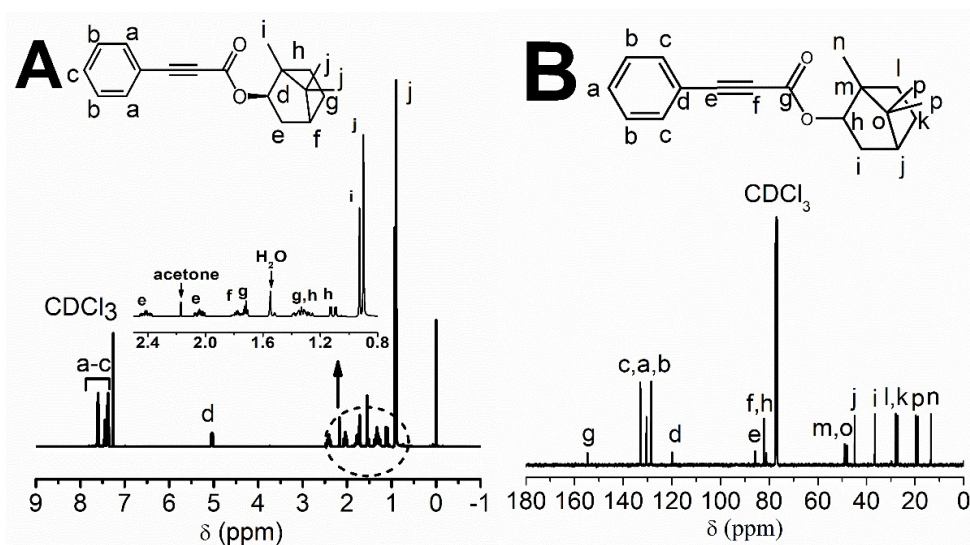

**Figure S3.**  $^1\text{H}$  NMR (A) and  $^{13}\text{C}$  NMR (B) spectrum of (+)-M1 in  $\text{CDCl}_3$ .

$^1\text{H}$  NMR (400 MHz,  $\text{CDCl}_3$ ):  $\delta$  ppm, 7.34-7.66 (m, 5H, Ar-H),  $\delta$  5.04 (t, 1H, CH),  $\delta$  2.0-2.4 (m, 2H,  $\text{CH}_2$ ),  $\delta$  1.78 (t, 1H, CH),  $\delta$  1.35-1.72 (m, 2H,  $\text{CH}_2$ ),  $\delta$  1.09-1.28 (m, 2H,  $\text{CH}_2$ ),  $\delta$  0.93 (s, 3H,  $\text{CH}_3$ ),  $\delta$  0.90 (s, 6H,  $\text{CH}_3$ ).

$^{13}\text{C}$  NMR (100 MHz,  $\text{CDCl}_3$ ):  $\delta$  ppm, 154.8, 133.2, 130.1, 128.2, 119.5, 85.7, 82.2, 80.8, 48.9, 47.5, 44.5, 36.2, 27.9, 27.4, 19.6, 13.2.

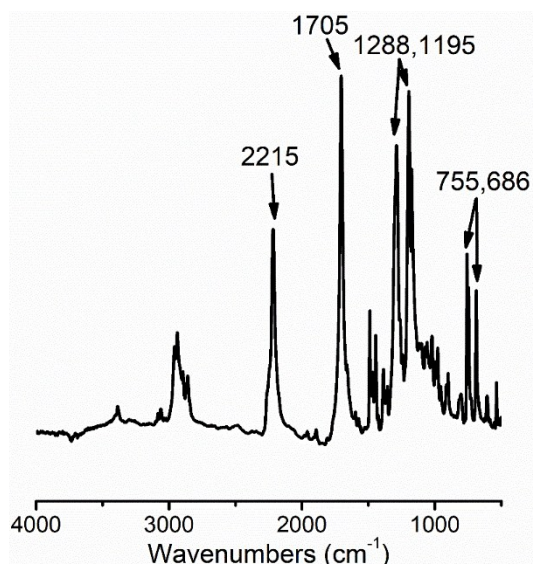

**Figure S4.** FT-IR spectrum of the crosslinker (in KBr tablet).

In FT-IR spectrum of the cross-linker, 2223  $\text{cm}^{-1}$  for ( $-\text{C}\equiv\text{C}$ ); 1702  $\text{cm}^{-1}$ , 1290  $\text{cm}^{-1}$  and 1189  $\text{cm}^{-1}$  for ( $-\text{CO}-\text{O}-$ ), 765  $\text{cm}^{-1}$  and 690  $\text{cm}^{-1}$  for benzene ring.

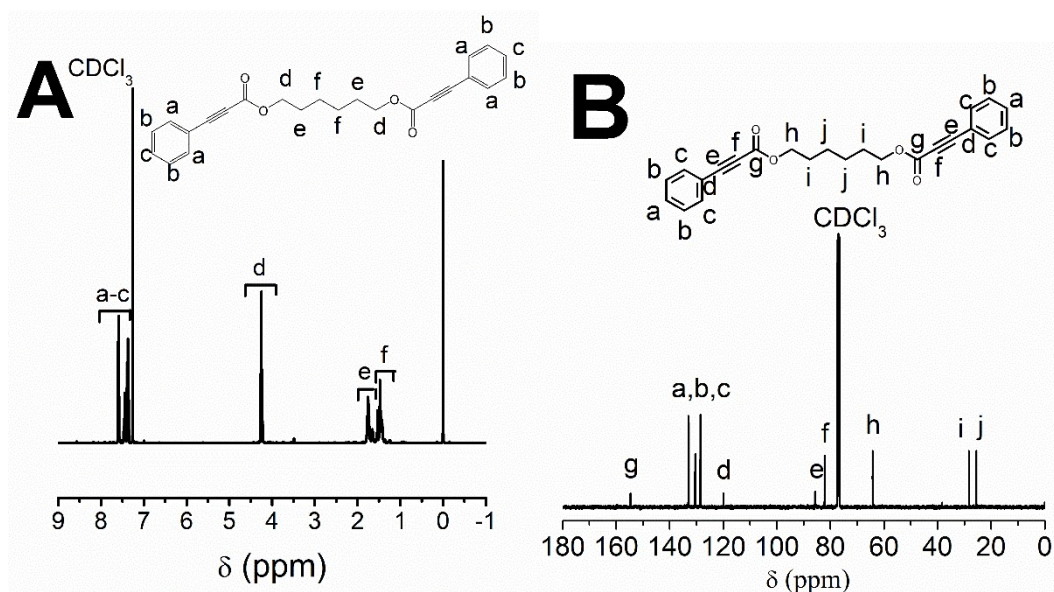

**Figure S5.**  $^1\text{H}$  NMR spectrum of crosslinker in  $\text{CDCl}_3$ .

$^1\text{H}$  NMR (400 MHz,  $\text{CDCl}_3$ ):  $\delta$  ppm, 7.33-7.66 (m, 10H, Ar-H),  $\delta$  4.24 (t, 4H,  $\text{CH}_2$ ),  $\delta$  1.64-1.78 (t, 4H,  $\text{CH}_2$ ),  $\delta$  1.43-1.54 (t, 4H,  $\text{CH}_2$ ).

$^{13}\text{C}$  NMR (100 MHz,  $\text{CDCl}_3$ ):  $\delta$  ppm, 154.7, 133.1, 130.2, 128.3, 119.6, 85.7, 82.2, 64.1, 28.4, 25.5.

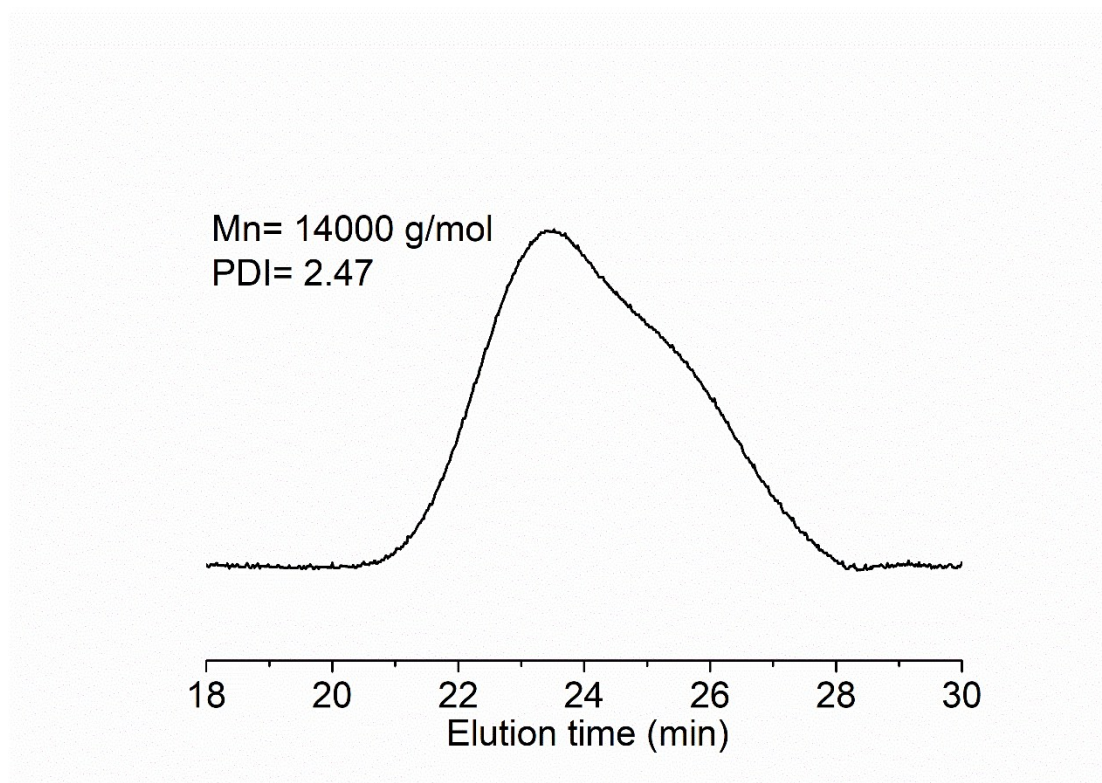

**Figure S6.** GPC chromatogram of (+)-P1 calibrated with polystyrenes, using DMF as eluent, at room temperature, polymer concentration 1 mg/ml.

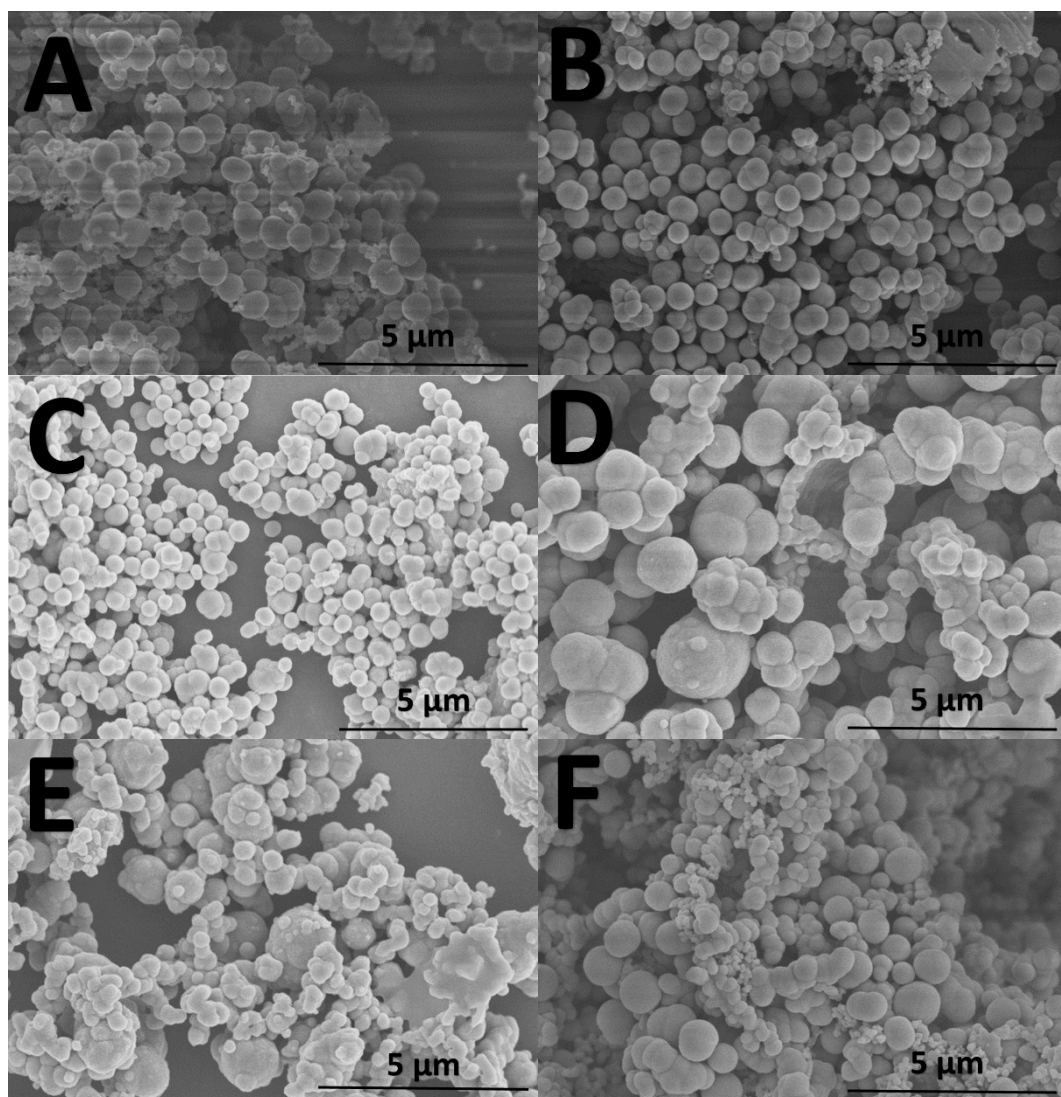

**Figure S7.** SEM images of (+)-CCPMs prepared in dioxane/ butyl acetate solvent mixture with varied ratio: A, 1/9; B, 2/8; C, 3/7; D, 4/6; E, 5/5; F, 6/4; (v/v)  $\text{WCl}_6$ , 10 mg;  $\text{Ph}_4\text{Sn}$ , 10.7, mg; (+)-M1 amount, 50 mg; crosslinker amount, 10 mg; polymerization at 80 °C for 24 h.



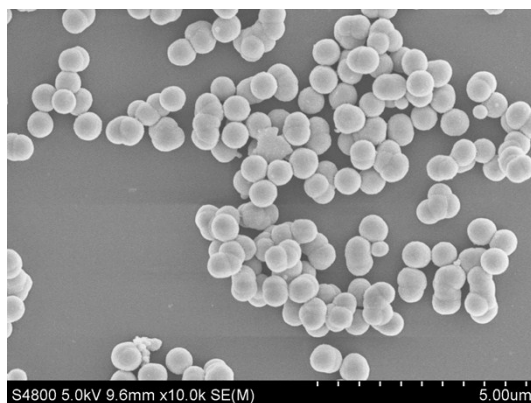

**Figure S8.** SEM image of polymer particles prepared with (+)-M1 in the absence of crosslinker; (+)-M1 50 mg, dioxane/DMF = 9.85/0.15 (v/v),  $\text{WCl}_6/\text{Ph}_4\text{Sn}$  = 10/10.7 in mg.

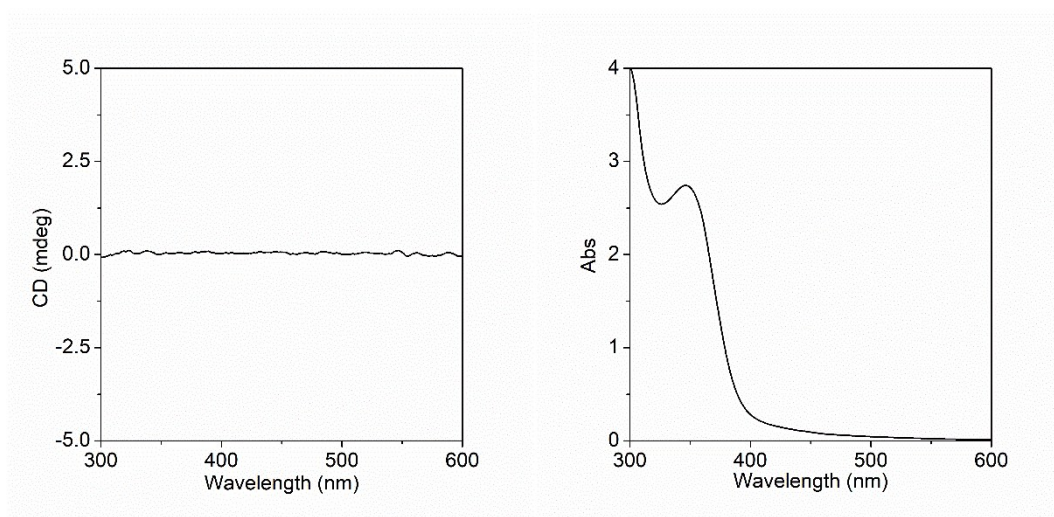

**Figure S9.** CD and UV-vis absorption spectra of (+)- and (-)-CCPMs mixture with equal amount, measured by dispersing microspheres in dioxane solvent.

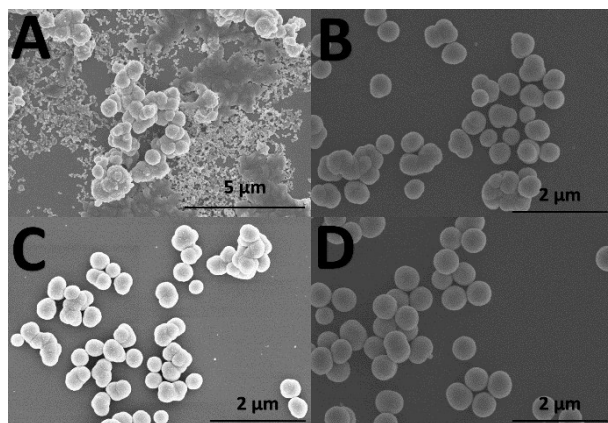

**Figure S10.** SEM images of NPs prepared by  $\text{WCl}_6\text{-Ph}_4\text{Sn}$  with different amount: A, 10/11; B, 20/21.5; C, 30/33; D, 40/43 in mg. (dioxane/butyl acetate, 2/8, v/v; (+)-M1 amount, 0.14 ml; polymerization at 80 °C for 24 h)

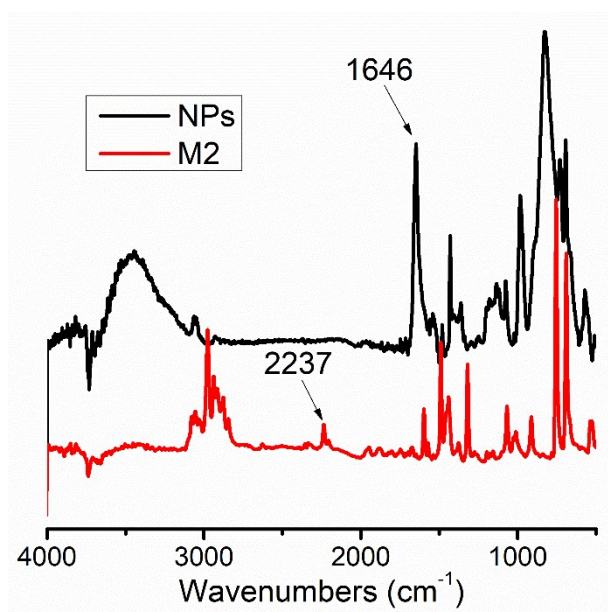

**Figure S11.** FT-IR spectrum of M2 and corresponding NPs (with KBr as tablet).

In FT-IR spectrum of M2 and NPs, 2237  $\text{cm}^{-1}$  for  $(-\text{C}\equiv\text{C})$ ; 1646  $\text{cm}^{-1}$  for  $(\text{C}=\text{C})$ .

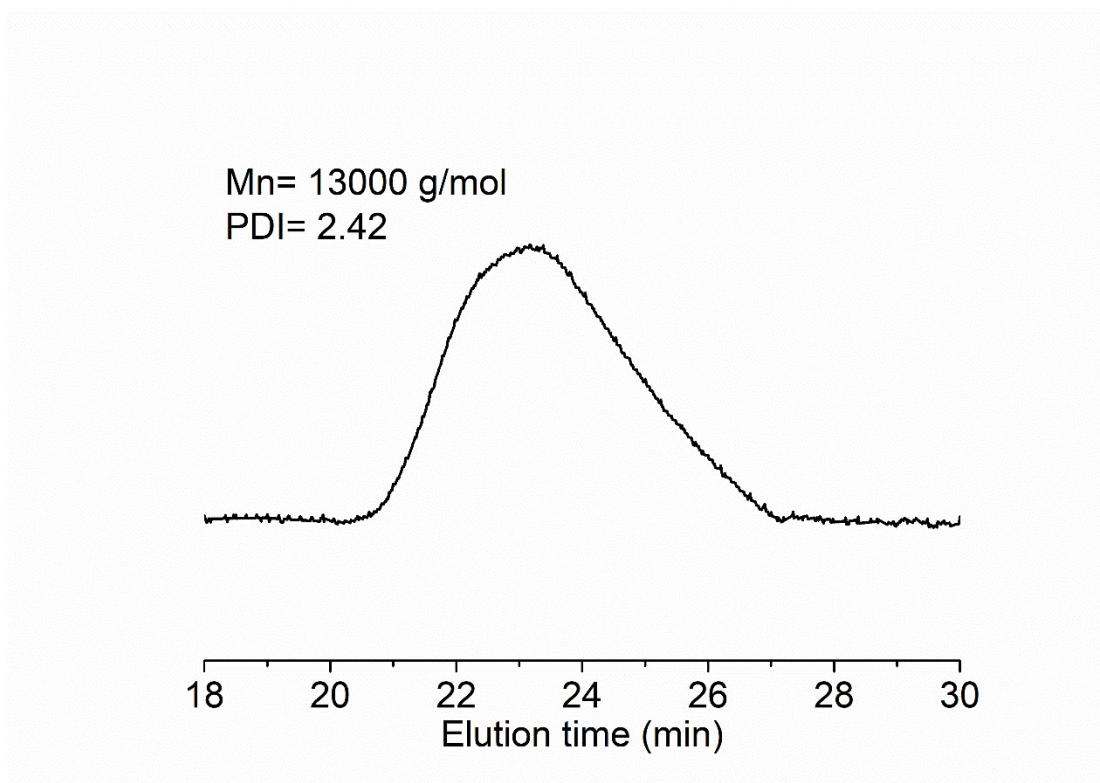

**Figure S12.** GPC chromatogram of P2 calibrated with polystyrenes, using DMF as eluent, at room temperature, polymer concentration 1mg/ml.

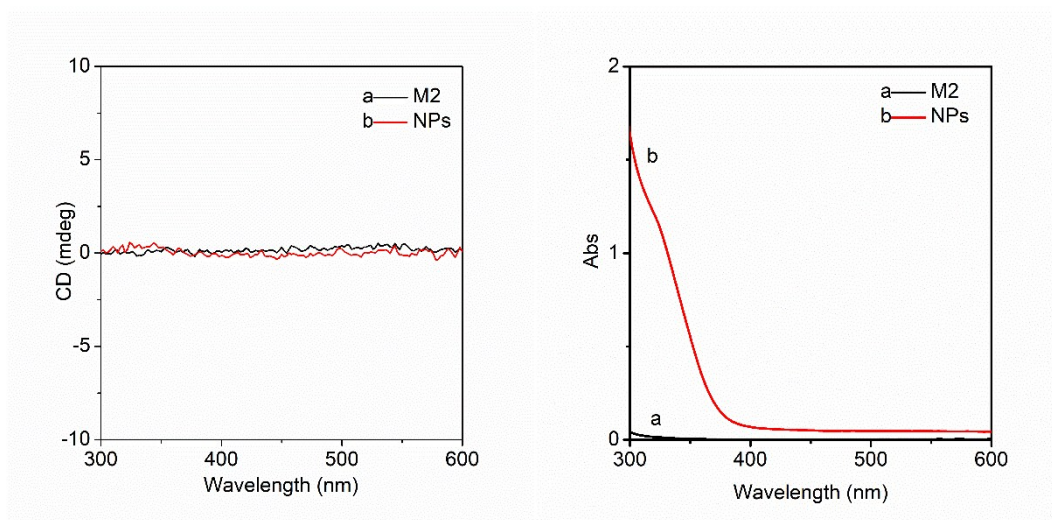

**Figure S13.** CD and UV-vis absorption spectra of M2 and P2, measured by dissolving M2 and P2 in DMF solvent ( $c= 10^{-4}$  M, by monomer units).
